# Supplementary material
Source: publisher figshare collection journal article supplement (https://acs.figshare.com/ndownloader/files/5698329)
Supplement: Supplementary file 1 [file 5698329]

Author_Dong Gon Park, Zoltan A. Gal, Francis J. DiSalvo
Title_Synthesis and Structure of Sr3GaN3 and Sr6GaN5: Strontium Gallium Nitrides with Isolated Planar [GaN3]6- Anions. 
 
data_63omp
 
_audit_creation_method            SHELXL-97
_chemical_name_systematic
;
 ?
;
_chemical_name_common             'strontium three gallium trinitride'
_chemical_melting_point           ?
_chemical_formula_moiety          ?
_chemical_formula_sum
 'Ga N3 Sr3'
_chemical_formula_weight          374.61
 
loop_
 _atom_type_symbol
 _atom_type_description
 _atom_type_scat_dispersion_real
 _atom_type_scat_dispersion_imag
 _atom_type_scat_source
 'N'  'N'   0.0061   0.0033
 'International Tables Vol C Tables 4.2.6.8 and 6.1.1.4'
 'Ga'  'Ga'   0.2307   1.6083
 'International Tables Vol C Tables 4.2.6.8 and 6.1.1.4'
 'Sr'  'Sr'  -1.5307   3.2498
 'International Tables Vol C Tables 4.2.6.8 and 6.1.1.4'
 
_symmetry_cell_setting            Hexagonal
_symmetry_space_group_name_H-M    P63/m
 
loop_
 _symmetry_equiv_pos_as_xyz
 'x, y, z'
 '-x, -y, z+1/2'
 '-y, x-y, z'
 'y, -x+y, z+1/2'
 '-x+y, -x, z'
 'x-y, x, z+1/2'
 '-x, -y, -z'
 'x, y, -z-1/2'
 'y, -x+y, -z'
 '-y, x-y, -z-1/2'
 'x-y, x, -z'
 '-x+y, -x, -z-1/2'
 
_cell_length_a                    7.584(2)
_cell_length_b                    7.584(2)
_cell_length_c                    5.410(3)
_cell_angle_alpha                 90.00
_cell_angle_beta                  90.00
_cell_angle_gamma                 120.00
_cell_volume                      269.51(17)
_cell_formula_units_Z             2
_cell_measurement_temperature     235(2)
_cell_measurement_reflns_used     287
_cell_measurement_theta_min       3.1
_cell_measurement_theta_max       32.02
 
_exptl_crystal_description        'truncated parallelepiped-roughly spherical'
_exptl_crystal_colour             black
_exptl_crystal_size_max           0.05
_exptl_crystal_size_mid           0.05
_exptl_crystal_size_min           0.05
_exptl_crystal_density_meas       ?
_exptl_crystal_density_diffrn     4.616
_exptl_crystal_density_method     'not measured'
_exptl_crystal_F_000              332
_exptl_absorpt_coefficient_mu     34.328
_exptl_absorpt_correction_type    Empirical
_exptl_absorpt_correction_T_min   0.2787
_exptl_absorpt_correction_T_max   0.2787
_exptl_absorpt_process_details    'Ellipsoidal'
 
_exptl_special_details
;
 ?
;
 
_diffrn_ambient_temperature       235(2)
_diffrn_radiation_wavelength      0.71073
_diffrn_radiation_type            MoK\a
_diffrn_radiation_source          'fine-focus sealed tube'
_diffrn_radiation_monochromator   graphite
_diffrn_measurement_device_type   'Bruker Smart CCD'
_diffrn_measurement_method        omega scan/phi scan
_diffrn_detector_area_resol_mean  ?
_diffrn_standards_number          0
_diffrn_standards_interval_count  ?
_diffrn_standards_interval_time   ?
_diffrn_standards_decay_%         ?
_diffrn_reflns_number             706
_diffrn_reflns_av_R_equivalents   0.0301
_diffrn_reflns_av_sigmaI/netI     0.0335
_diffrn_reflns_limit_h_min        -10
_diffrn_reflns_limit_h_max        4
_diffrn_reflns_limit_k_min        -4
_diffrn_reflns_limit_k_max        10
_diffrn_reflns_limit_l_min        -1
_diffrn_reflns_limit_l_max        7
_diffrn_reflns_theta_min          3.10
_diffrn_reflns_theta_max          32.02
_reflns_number_total              287
_reflns_number_gt                 267
_reflns_threshold_expression      >2sigma(I)
 
_computing_data_collection        'Bruker Smart 5.05'
_computing_cell_refinement        'Bruker Smart 5.05'
_computing_data_reduction         'SHELXL-97 (Sheldrick, 1997)'
_computing_structure_solution     'SHELXS-97 (Sheldrick, 1997)'
_computing_structure_refinement   'SHELXL-97 (Sheldrick, 1997)'
_computing_molecular_graphics     'Ortep 3'
_computing_publication_material   'Crystalmaker 7.0'
 
_refine_special_details
;
 Refinement of F^2^ against ALL reflections.  The weighted R-factor wR and
 goodness of fit S are based on F^2^, conventional R-factors R are based
 on F, with F set to zero for negative F^2^. The threshold expression of
 F^2^ > 2sigma(F^2^) is used only for calculating R-factors(gt) etc. and is
 not relevant to the choice of reflections for refinement.  R-factors based
 on F^2^ are statistically about twice as large as those based on F, and R-
 factors based on ALL data will be even larger.
;
 
_refine_ls_structure_factor_coef  Fsqd
_refine_ls_matrix_type            full
_refine_ls_weighting_scheme       calc
_refine_ls_weighting_details
 'calc w=1/[\s^2^(Fo^2^)+(0.0287P)^2^+2.2654P] where P=(Fo^2^+2Fc^2^)/3'
_atom_sites_solution_primary      direct
_atom_sites_solution_secondary    difmap
_atom_sites_solution_hydrogens    geom
_refine_ls_hydrogen_treatment     mixed
_refine_ls_extinction_method      SHELXL
_refine_ls_extinction_coef        0.072(5)
_refine_ls_extinction_expression
 'Fc^*^=kFc[1+0.001xFc^2^\l^3^/sin(2\q)]^-1/4^'
_refine_ls_number_reflns          287
_refine_ls_number_parameters      16
_refine_ls_number_restraints      0
_refine_ls_R_factor_all           0.0363
_refine_ls_R_factor_gt            0.0326
_refine_ls_wR_factor_ref          0.0818
_refine_ls_wR_factor_gt           0.0807
_refine_ls_goodness_of_fit_ref    1.274
_refine_ls_restrained_S_all       1.274
_refine_ls_shift/su_max           0.000
_refine_ls_shift/su_mean          0.000
 
loop_
 _atom_site_label
 _atom_site_type_symbol
 _atom_site_fract_x
 _atom_site_fract_y
 _atom_site_fract_z
 _atom_site_U_iso_or_equiv
 _atom_site_adp_type
 _atom_site_occupancy
 _atom_site_symmetry_multiplicity
 _atom_site_calc_flag
 _atom_site_refinement_flags
 _atom_site_disorder_assembly
 _atom_site_disorder_group
Sr Sr 0.35678(11) 0.28378(12) 0.2500 0.0073(3) Uani 1 2 d S . .
Ga Ga 0.3333 0.6667 0.2500 0.0058(4) Uani 1 6 d S . .
N N 0.0922(11) 0.3988(11) 0.2500 0.0085(13) Uani 1 2 d S . .
 
loop_
 _atom_site_aniso_label
 _atom_site_aniso_U_11
 _atom_site_aniso_U_22
 _atom_site_aniso_U_33
 _atom_site_aniso_U_23
 _atom_site_aniso_U_13
 _atom_site_aniso_U_12
Sr 0.0083(5) 0.0080(4) 0.0067(4) 0.000 0.000 0.0048(3)
Ga 0.0058(5) 0.0058(5) 0.0059(7) 0.000 0.000 0.0029(3)
N 0.007(3) 0.006(3) 0.012(3) 0.000 0.000 0.003(3)
 
_geom_special_details
;
 All esds (except the esd in the dihedral angle between two l.s. planes)
 are estimated using the full covariance matrix.  The cell esds are taken
 into account individually in the estimation of esds in distances, angles
 and torsion angles; correlations between esds in cell parameters are only
 used when they are defined by crystal symmetry.  An approximate (isotropic)
 treatment of cell esds is used for estimating esds involving l.s. planes.
;
 
loop_
 _geom_bond_atom_site_label_1
 _geom_bond_atom_site_label_2
 _geom_bond_distance
 _geom_bond_site_symmetry_2
 _geom_bond_publ_flag
Sr N 2.557(7) . ?
Sr N 2.682(8) 5 ?
Sr N 2.707(8) 3_665 ?
Sr N 2.7193(15) 9_556 ?
Sr N 2.7193(15) 9 ?
Sr Ga 2.9968(12) . ?
Sr Ga 3.4784(12) 7_666 ?
Sr Ga 3.4784(12) 7_665 ?
Sr Sr 3.6672(12) 9 ?
Sr Sr 3.6672(12) 11 ?
Sr Sr 3.6672(12) 9_556 ?
Sr Sr 3.6672(12) 11_556 ?
Ga N 1.938(7) 5_565 ?
Ga N 1.938(7) . ?
Ga N 1.938(7) 3_665 ?
Ga Sr 2.9968(12) 5_565 ?
Ga Sr 2.9968(12) 3_665 ?
Ga Sr 3.4784(12) 9_566 ?
Ga Sr 3.4784(12) 11 ?
Ga Sr 3.4784(12) 9_565 ?
Ga Sr 3.4784(12) 7_666 ?
Ga Sr 3.4784(12) 11_556 ?
Ga Sr 3.4784(12) 7_665 ?
N Sr 2.682(8) 3 ?
N Sr 2.707(7) 5_565 ?
N Sr 2.7193(15) 11 ?
N Sr 2.7193(15) 11_556 ?
 
loop_
 _geom_angle_atom_site_label_1
 _geom_angle_atom_site_label_2
 _geom_angle_atom_site_label_3
 _geom_angle
 _geom_angle_site_symmetry_1
 _geom_angle_site_symmetry_3
 _geom_angle_publ_flag
N Sr N 130.1(3) . 5 ?
N Sr N 79.2(3) . 3_665 ?
N Sr N 150.7(2) 5 3_665 ?
N Sr N 93.75(15) . 9_556 ?
N Sr N 91.00(14) 5 9_556 ?
N Sr N 86.32(16) 3_665 9_556 ?
N Sr N 93.75(15) . 9 ?
N Sr N 91.00(14) 5 9 ?
N Sr N 86.32(16) 3_665 9 ?
N Sr N 168.3(3) 9_556 9 ?
N Sr Ga 39.87(17) . . ?
N Sr Ga 169.99(16) 5 . ?
N Sr Ga 39.31(16) 3_665 . ?
N Sr Ga 90.02(16) 9_556 . ?
N Sr Ga 90.02(16) 9 . ?
N Sr Ga 124.49(6) . 7_666 ?
N Sr Ga 81.02(10) 5 7_666 ?
N Sr Ga 80.68(10) 3_665 7_666 ?
N Sr Ga 33.70(16) 9_556 7_666 ?
N Sr Ga 135.68(16) 9 7_666 ?
Ga Sr Ga 105.044(17) . 7_666 ?
N Sr Ga 124.49(6) . 7_665 ?
N Sr Ga 81.02(10) 5 7_665 ?
N Sr Ga 80.68(10) 3_665 7_665 ?
N Sr Ga 135.68(16) 9_556 7_665 ?
N Sr Ga 33.70(16) 9 7_665 ?
Ga Sr Ga 105.044(17) . 7_665 ?
Ga Sr Ga 102.10(4) 7_666 7_665 ?
N Sr Sr 113.39(10) . 9 ?
N Sr Sr 47.67(2) 5 9 ?
N Sr Sr 127.65(6) 3_665 9 ?
N Sr Sr 138.63(16) 9_556 9 ?
N Sr Sr 44.17(16) 9 9 ?
Ga Sr Sr 130.903(17) . 9 ?
Ga Sr Sr 119.87(3) 7_666 9 ?
Ga Sr Sr 49.50(2) 7_665 9 ?
N Sr Sr 47.82(2) . 11 ?
N Sr Sr 112.24(10) 5 11 ?
N Sr Sr 86.76(11) 3_665 11 ?
N Sr Sr 141.56(16) 9_556 11 ?
N Sr Sr 46.81(16) 9 11 ?
Ga Sr Sr 61.97(2) . 11 ?
Ga Sr Sr 166.71(2) 7_666 11 ?
Ga Sr Sr 79.97(3) 7_665 11 ?
Sr Sr Sr 71.56(3) 9 11 ?
N Sr Sr 113.39(10) . 9_556 ?
N Sr Sr 47.67(2) 5 9_556 ?
N Sr Sr 127.65(6) 3_665 9_556 ?
N Sr Sr 44.17(16) 9_556 9_556 ?
N Sr Sr 138.63(16) 9 9_556 ?
Ga Sr Sr 130.903(17) . 9_556 ?
Ga Sr Sr 49.50(2) 7_666 9_556 ?
Ga Sr Sr 119.87(3) 7_665 9_556 ?
Sr Sr Sr 95.07(4) 9 9_556 ?
Sr Sr Sr 140.541(14) 11 9_556 ?
N Sr Sr 47.82(2) . 11_556 ?
N Sr Sr 112.24(10) 5 11_556 ?
N Sr Sr 86.76(11) 3_665 11_556 ?
N Sr Sr 46.81(16) 9_556 11_556 ?
N Sr Sr 141.56(16) 9 11_556 ?
Ga Sr Sr 61.97(2) . 11_556 ?
Ga Sr Sr 79.97(3) 7_666 11_556 ?
Ga Sr Sr 166.71(2) 7_665 11_556 ?
Sr Sr Sr 140.541(14) 9 11_556 ?
Sr Sr Sr 95.07(4) 11 11_556 ?
Sr Sr Sr 71.56(3) 9_556 11_556 ?
N Ga N 120.000(1) 5_565 . ?
N Ga N 120.000(1) 5_565 3_665 ?
N Ga N 120.0 . 3_665 ?
N Ga Sr 57.7(2) 5_565 5_565 ?
N Ga Sr 62.3(2) . 5_565 ?
N Ga Sr 177.7(2) 3_665 5_565 ?
N Ga Sr 62.3(2) 5_565 3_665 ?
N Ga Sr 177.7(2) . 3_665 ?
N Ga Sr 57.7(2) 3_665 3_665 ?
Sr Ga Sr 120.0 5_565 3_665 ?
N Ga Sr 177.7(2) 5_565 . ?
N Ga Sr 57.7(2) . . ?
N Ga Sr 62.3(2) 3_665 . ?
Sr Ga Sr 120.0 5_565 . ?
Sr Ga Sr 120.0 3_665 . ?
N Ga Sr 51.13(2) 5_565 9_566 ?
N Ga Sr 106.37(13) . 9_566 ?
N Ga Sr 110.22(12) 3_665 9_566 ?
Sr Ga Sr 68.53(2) 5_565 9_566 ?
Sr Ga Sr 74.956(17) 3_665 9_566 ?
Sr Ga Sr 128.728(18) . 9_566 ?
N Ga Sr 110.22(12) 5_565 11 ?
N Ga Sr 51.13(2) . 11 ?
N Ga Sr 106.37(13) 3_665 11 ?
Sr Ga Sr 74.956(17) 5_565 11 ?
Sr Ga Sr 128.728(18) 3_665 11 ?
Sr Ga Sr 68.53(2) . 11 ?
Sr Ga Sr 143.361(15) 9_566 11 ?
N Ga Sr 51.13(2) 5_565 9_565 ?
N Ga Sr 106.37(13) . 9_565 ?
N Ga Sr 110.22(12) 3_665 9_565 ?
Sr Ga Sr 68.53(2) 5_565 9_565 ?
Sr Ga Sr 74.956(17) 3_665 9_565 ?
Sr Ga Sr 128.728(18) . 9_565 ?
Sr Ga Sr 102.10(4) 9_566 9_565 ?
Sr Ga Sr 65.97(3) 11 9_565 ?
N Ga Sr 106.37(13) 5_565 7_666 ?
N Ga Sr 110.22(12) . 7_666 ?
N Ga Sr 51.13(2) 3_665 7_666 ?
Sr Ga Sr 128.728(18) 5_565 7_666 ?
Sr Ga Sr 68.53(2) 3_665 7_666 ?
Sr Ga Sr 74.956(17) . 7_666 ?
Sr Ga Sr 65.97(3) 9_566 7_666 ?
Sr Ga Sr 143.361(15) 11 7_666 ?
Sr Ga Sr 143.361(15) 9_565 7_666 ?
N Ga Sr 110.22(12) 5_565 11_556 ?
N Ga Sr 51.13(2) . 11_556 ?
N Ga Sr 106.37(13) 3_665 11_556 ?
Sr Ga Sr 74.956(17) 5_565 11_556 ?
Sr Ga Sr 128.728(18) 3_665 11_556 ?
Sr Ga Sr 68.53(2) . 11_556 ?
Sr Ga Sr 65.97(3) 9_566 11_556 ?
Sr Ga Sr 102.10(4) 11 11_556 ?
Sr Ga Sr 143.361(15) 9_565 11_556 ?
Sr Ga Sr 65.97(3) 7_666 11_556 ?
N Ga Sr 106.37(13) 5_565 7_665 ?
N Ga Sr 110.22(12) . 7_665 ?
N Ga Sr 51.13(2) 3_665 7_665 ?
Sr Ga Sr 128.728(18) 5_565 7_665 ?
Sr Ga Sr 68.53(2) 3_665 7_665 ?
Sr Ga Sr 74.956(17) . 7_665 ?
Sr Ga Sr 143.361(15) 9_566 7_665 ?
Sr Ga Sr 65.97(3) 11 7_665 ?
Sr Ga Sr 65.97(3) 9_565 7_665 ?
Sr Ga Sr 102.10(4) 7_666 7_665 ?
Sr Ga Sr 143.361(15) 11_556 7_665 ?
Ga N Sr 82.4(3) . . ?
Ga N Sr 167.7(4) . 3 ?
Sr N Sr 109.9(3) . 3 ?
Ga N Sr 78.4(2) . 5_565 ?
Sr N Sr 160.8(3) . 5_565 ?
Sr N Sr 89.3(2) 3 5_565 ?
Ga N Sr 95.17(16) . 11 ?
Sr N Sr 88.01(16) . 11 ?
Sr N Sr 85.53(16) 3 11 ?
Sr N Sr 93.68(16) 5_565 11 ?
Ga N Sr 95.17(16) . 11_556 ?
Sr N Sr 88.01(16) . 11_556 ?
Sr N Sr 85.53(16) 3 11_556 ?
Sr N Sr 93.68(16) 5_565 11_556 ?
Sr N Sr 168.3(3) 11 11_556 ?
 
_diffrn_measured_fraction_theta_max    0.842
_diffrn_reflns_theta_full              32.02
_diffrn_measured_fraction_theta_full   0.842
_refine_diff_density_max    1.589
_refine_diff_density_min   -1.204
_refine_diff_density_rms    0.287

#===END

Author_Dong Gon Park, Zoltan A. Gal, Francis J. DiSalvo
Title_Synthesis and Structure of Sr3GaN3 and Sr6GaN5: Strontium Gallium Nitrides with Isolated Planar [GaN3]6- Anions. 
  
data_face
 
_audit_creation_method            SHELXL-97
_chemical_name_systematic
;
 ?
;
_chemical_name_common             'strontium six gallium pentanitrate'
_chemical_melting_point           ?
_chemical_formula_moiety          ?
_chemical_formula_sum
 'Ga N5 Sr6'
_chemical_formula_weight          665.49
 
loop_
 _atom_type_symbol
 _atom_type_description
 _atom_type_scat_dispersion_real
 _atom_type_scat_dispersion_imag
 _atom_type_scat_source
 'N'  'N'   0.0061   0.0033
 'International Tables Vol C Tables 4.2.6.8 and 6.1.1.4'
 'Ga'  'Ga'   0.2307   1.6083
 'International Tables Vol C Tables 4.2.6.8 and 6.1.1.4'
 'Sr'  'Sr'  -1.5307   3.2498
 'International Tables Vol C Tables 4.2.6.8 and 6.1.1.4'
 
_symmetry_cell_setting            Hexagonal
_symmetry_space_group_name_H-M    P63/mcm
 
loop_
 _symmetry_equiv_pos_as_xyz
 'x, y, z'
 '-x, -y, z+1/2'
 '-y, -x, -z'
 'y, x, -z+1/2'
 'x-y, -y, -z+1/2'
 '-x+y, y, -z'
 'x, x-y, -z'
 '-x, -x+y, -z+1/2'
 '-y, x-y, z'
 'y, -x+y, z+1/2'
 'x-y, x, z+1/2'
 '-x+y, -x, z'
 '-x, -y, -z'
 'x, y, -z-1/2'
 'y, x, z'
 '-y, -x, z-1/2'
 '-x+y, y, z-1/2'
 'x-y, -y, z'
 '-x, -x+y, z'
 'x, x-y, z-1/2'
 'y, -x+y, -z'
 '-y, x-y, -z-1/2'
 '-x+y, -x, -z-1/2'
 'x-y, x, -z'
 
_cell_length_a                    6.6667(6)
_cell_length_b                    6.6667(6)
_cell_length_c                    12.9999(17)
_cell_angle_alpha                 90.00
_cell_angle_beta                  90.00
_cell_angle_gamma                 120.00
_cell_volume                      500.37(9)
_cell_formula_units_Z             2
_cell_measurement_temperature     173(2)
_cell_measurement_reflns_used     288
_cell_measurement_theta_min       3.13
_cell_measurement_theta_max       29.99
 
_exptl_crystal_description        'truncated parallelepiped'
_exptl_crystal_colour             black
_exptl_crystal_size_max           0.06
_exptl_crystal_size_mid           0.06
_exptl_crystal_size_min           0.04
_exptl_crystal_density_meas       ?
_exptl_crystal_density_diffrn     4.417
_exptl_crystal_density_method     'not measured'
_exptl_crystal_F_000              588
_exptl_absorpt_coefficient_mu     34.334
_exptl_absorpt_correction_type    Analytical
_exptl_absorpt_correction_T_min   0.2325
_exptl_absorpt_correction_T_max   0.3405
_exptl_absorpt_process_details    'Gaussian face-indexed absorption correction'
 
_exptl_special_details
;
 ?
;
 
_diffrn_ambient_temperature       293(2)
_diffrn_radiation_wavelength      0.71073
_diffrn_radiation_type            MoK\a
_diffrn_radiation_source          'fine-focus sealed tube'
_diffrn_radiation_monochromator   graphite
_diffrn_measurement_device_type   'Bruker Smart CCD'
_diffrn_measurement_method        'omega-scan/ phi-scan'
_diffrn_detector_area_resol_mean  ?
_diffrn_standards_number          0
_diffrn_standards_interval_count  ?
_diffrn_standards_interval_time   ?
_diffrn_standards_decay_%         ?
_diffrn_reflns_number             5005
_diffrn_reflns_av_R_equivalents   0.1232
_diffrn_reflns_av_sigmaI/netI     0.0341
_diffrn_reflns_limit_h_min        -9
_diffrn_reflns_limit_h_max        9
_diffrn_reflns_limit_k_min        -8
_diffrn_reflns_limit_k_max        9
_diffrn_reflns_limit_l_min        -17
_diffrn_reflns_limit_l_max        17
_diffrn_reflns_theta_min          3.13
_diffrn_reflns_theta_max          29.99
_reflns_number_total              288
_reflns_number_gt                 266
_reflns_threshold_expression      >2sigma(I)
 
_computing_data_collection        'Bruker Smart 5.05'
_computing_cell_refinement        'Bruker Smart 5.05'
_computing_data_reduction         'SHELXL-97 (Sheldrick, 1997)'
_computing_structure_solution     'SHELXS-97 (Sheldrick, 1997)'
_computing_structure_refinement   'SHELXL-97 (Sheldrick, 1997)'
_computing_molecular_graphics     'Ortep 3'
_computing_publication_material   'Crystalmaker 7.0'
 
_refine_special_details
;
 Refinement of F^2^ against ALL reflections.  The weighted R-factor wR and
 goodness of fit S are based on F^2^, conventional R-factors R are based
 on F, with F set to zero for negative F^2^. The threshold expression of
 F^2^ > 2sigma(F^2^) is used only for calculating R-factors(gt) etc. and is
 not relevant to the choice of reflections for refinement.  R-factors based
 on F^2^ are statistically about twice as large as those based on F, and R-
 factors based on ALL data will be even larger.
;
 
_refine_ls_structure_factor_coef  Fsqd
_refine_ls_matrix_type            full
_refine_ls_weighting_scheme       calc
_refine_ls_weighting_details
 'calc w=1/[\s^2^(Fo^2^)+(0.0348P)^2^+4.8694P] where P=(Fo^2^+2Fc^2^)/3'
_atom_sites_solution_primary      direct
_atom_sites_solution_secondary    difmap
_atom_sites_solution_hydrogens    geom
_refine_ls_hydrogen_treatment     mixed
_refine_ls_extinction_method      SHELXL
_refine_ls_extinction_coef        0.0088(13)
_refine_ls_extinction_expression
 'Fc^*^=kFc[1+0.001xFc^2^\l^3^/sin(2\q)]^-1/4^'
_refine_ls_number_reflns          288
_refine_ls_number_parameters      16
_refine_ls_number_restraints      0
_refine_ls_R_factor_all           0.0460
_refine_ls_R_factor_gt            0.0421
_refine_ls_wR_factor_ref          0.0876
_refine_ls_wR_factor_gt           0.0868
_refine_ls_goodness_of_fit_ref    1.271
_refine_ls_restrained_S_all       1.271
_refine_ls_shift/su_max           0.000
_refine_ls_shift/su_mean          0.000
 
loop_
 _atom_site_label
 _atom_site_type_symbol
 _atom_site_fract_x
 _atom_site_fract_y
 _atom_site_fract_z
 _atom_site_U_iso_or_equiv
 _atom_site_adp_type
 _atom_site_occupancy
 _atom_site_symmetry_multiplicity
 _atom_site_calc_flag
 _atom_site_refinement_flags
 _atom_site_disorder_assembly
 _atom_site_disorder_group
Sr Sr 0.59525(11) 0.0000 0.12374(5) 0.0065(3) Uani 1 2 d S . .
Ga Ga 0.0000 0.0000 0.2500 0.0031(5) Uani 1 12 d S . .
N2 N 0.3333 0.6667 0.0000 0.009(2) Uani 1 6 d S . .
N1 N 0.2843(15) 0.0000 0.2500 0.010(2) Uani 1 4 d S . .
 
loop_
 _atom_site_aniso_label
 _atom_site_aniso_U_11
 _atom_site_aniso_U_22
 _atom_site_aniso_U_33
 _atom_site_aniso_U_23
 _atom_site_aniso_U_13
 _atom_site_aniso_U_12
Sr 0.0068(4) 0.0063(4) 0.0064(5) 0.000 -0.0015(2) 0.0032(2)
Ga 0.0026(6) 0.0026(6) 0.0041(10) 0.000 0.000 0.0013(3)
N2 0.009(3) 0.009(3) 0.009(6) 0.000 0.000 0.0047(16)
N1 0.006(3) 0.006(4) 0.018(5) 0.000 0.000 0.003(2)
 
_geom_special_details
;
 All esds (except the esd in the dihedral angle between two l.s. planes)
 are estimated using the full covariance matrix.  The cell esds are taken
 into account individually in the estimation of esds in distances, angles
 and torsion angles; correlations between esds in cell parameters are only
 used when they are defined by crystal symmetry.  An approximate (isotropic)
 treatment of cell esds is used for estimating esds involving l.s. planes.
;
 
loop_
 _geom_bond_atom_site_label_1
 _geom_bond_atom_site_label_2
 _geom_bond_distance
 _geom_bond_site_symmetry_2
 _geom_bond_publ_flag
Sr N2 2.5874(5) 1_545 ?
Sr N2 2.5874(5) 13_665 ?
Sr N1 2.644(8) . ?
Sr N1 2.907(2) 15_655 ?
Sr N1 2.907(2) 19_655 ?
Sr Ga 3.1584(8) 1_655 ?
Sr Sr 3.2828(15) 14_556 ?
Sr Sr 3.4588(15) 13_655 ?
Sr Sr 3.5101(5) 15_545 ?
Sr Sr 3.5101(5) 15_655 ?
Sr Sr 3.5101(5) 19_655 ?
Sr Sr 3.5101(5) 19_665 ?
Ga N1 1.895(10) 19 ?
Ga N1 1.895(10) 15 ?
Ga N1 1.895(10) . ?
Ga Sr 3.1584(8) 8_665 ?
Ga Sr 3.1584(8) 1_455 ?
Ga Sr 3.1584(8) 15_545 ?
Ga Sr 3.1584(8) 19_665 ?
Ga Sr 3.1584(8) 14_456 ?
Ga Sr 3.1584(8) 4_545 ?
N2 Sr 2.5874(5) 3_565 ?
N2 Sr 2.5874(5) 1_565 ?
N2 Sr 2.5874(5) 15 ?
N2 Sr 2.5874(5) 13_665 ?
N2 Sr 2.5874(5) 19_665 ?
N2 Sr 2.5874(5) 7 ?
N1 Sr 2.644(8) 14_556 ?
N1 Sr 2.907(2) 15_545 ?
N1 Sr 2.907(2) 8_665 ?
N1 Sr 2.907(2) 4_545 ?
N1 Sr 2.907(2) 19_665 ?
 
loop_
 _geom_angle_atom_site_label_1
 _geom_angle_atom_site_label_2
 _geom_angle_atom_site_label_3
 _geom_angle
 _geom_angle_site_symmetry_1
 _geom_angle_site_symmetry_3
 _geom_angle_publ_flag
N2 Sr N2 96.11(2) 1_545 13_665 ?
N2 Sr N1 101.16(9) 1_545 . ?
N2 Sr N1 101.16(9) 13_665 . ?
N2 Sr N1 156.73(19) 1_545 15_655 ?
N2 Sr N1 94.52(16) 13_665 15_655 ?
N1 Sr N1 97.0(2) . 15_655 ?
N2 Sr N1 94.52(16) 1_545 19_655 ?
N2 Sr N1 156.73(19) 13_665 19_655 ?
N1 Sr N1 97.0(2) . 19_655 ?
N1 Sr N1 68.7(4) 15_655 19_655 ?
N2 Sr Ga 122.193(18) 1_545 1_655 ?
N2 Sr Ga 122.193(18) 13_665 1_655 ?
N1 Sr Ga 110.32(14) . 1_655 ?
N1 Sr Ga 36.1(2) 15_655 1_655 ?
N1 Sr Ga 36.1(2) 19_655 1_655 ?
N2 Sr Sr 128.441(14) 1_545 14_556 ?
N2 Sr Sr 128.441(14) 13_665 14_556 ?
N1 Sr Sr 51.63(14) . 14_556 ?
N1 Sr Sr 55.63(3) 15_655 14_556 ?
N1 Sr Sr 55.63(3) 19_655 14_556 ?
Ga Sr Sr 58.688(14) 1_655 14_556 ?
N2 Sr Sr 48.057(12) 1_545 13_655 ?
N2 Sr Sr 48.057(12) 13_665 13_655 ?
N1 Sr Sr 106.83(14) . 13_655 ?
N1 Sr Sr 138.26(10) 15_655 13_655 ?
N1 Sr Sr 138.26(10) 19_655 13_655 ?
Ga Sr Sr 142.85(4) 1_655 13_655 ?
Sr Sr Sr 158.46(3) 14_556 13_655 ?
N2 Sr Sr 47.288(10) 1_545 15_545 ?
N2 Sr Sr 108.18(3) 13_665 15_545 ?
N1 Sr Sr 54.20(8) . 15_545 ?
N1 Sr Sr 145.60(2) 15_655 15_545 ?
N1 Sr Sr 94.2(2) 19_655 15_545 ?
Ga Sr Sr 129.605(13) 1_655 15_545 ?
Sr Sr Sr 90.0 14_556 15_545 ?
Sr Sr Sr 74.10(2) 13_655 15_545 ?
N2 Sr Sr 141.095(13) 1_545 15_655 ?
N2 Sr Sr 47.288(10) 13_665 15_655 ?
N1 Sr Sr 99.18(2) . 15_655 ?
N1 Sr Sr 47.53(17) 15_655 15_655 ?
N1 Sr Sr 115.5(2) 19_655 15_655 ?
Ga Sr Sr 79.989(18) 1_655 15_655 ?
Sr Sr Sr 90.0 14_556 15_655 ?
Sr Sr Sr 94.285(3) 13_655 15_655 ?
Sr Sr Sr 143.48(4) 15_545 15_655 ?
N2 Sr Sr 47.288(10) 1_545 19_655 ?
N2 Sr Sr 141.095(13) 13_665 19_655 ?
N1 Sr Sr 99.18(2) . 19_655 ?
N1 Sr Sr 115.5(2) 15_655 19_655 ?
N1 Sr Sr 47.53(17) 19_655 19_655 ?
Ga Sr Sr 79.989(18) 1_655 19_655 ?
Sr Sr Sr 90.0 14_556 19_655 ?
Sr Sr Sr 94.284(3) 13_655 19_655 ?
Sr Sr Sr 60.0 15_545 19_655 ?
Sr Sr Sr 156.52(4) 15_655 19_655 ?
N2 Sr Sr 108.18(3) 1_545 19_665 ?
N2 Sr Sr 47.288(10) 13_665 19_665 ?
N1 Sr Sr 54.20(8) . 19_665 ?
N1 Sr Sr 94.2(2) 15_655 19_665 ?
N1 Sr Sr 145.60(2) 19_655 19_665 ?
Ga Sr Sr 129.605(13) 1_655 19_665 ?
Sr Sr Sr 90.0 14_556 19_665 ?
Sr Sr Sr 74.10(2) 13_655 19_665 ?
Sr Sr Sr 83.48(4) 15_545 19_665 ?
Sr Sr Sr 60.0 15_655 19_665 ?
Sr Sr Sr 143.48(4) 19_655 19_665 ?
N1 Ga N1 120.000(1) 19 15 ?
N1 Ga N1 120.000(1) 19 . ?
N1 Ga N1 120.000(3) 15 . ?
N1 Ga Sr 148.688(14) 19 8_665 ?
N1 Ga Sr 64.712(4) 15 8_665 ?
N1 Ga Sr 64.712(4) . 8_665 ?
N1 Ga Sr 64.712(4) 19 1_455 ?
N1 Ga Sr 64.712(4) 15 1_455 ?
N1 Ga Sr 148.688(14) . 1_455 ?
Sr Ga Sr 129.423(8) 8_665 1_455 ?
N1 Ga Sr 64.712(4) 19 15_545 ?
N1 Ga Sr 148.688(14) 15 15_545 ?
N1 Ga Sr 64.712(4) . 15_545 ?
Sr Ga Sr 129.423(8) 8_665 15_545 ?
Sr Ga Sr 95.444(19) 1_455 15_545 ?
N1 Ga Sr 148.688(14) 19 19_665 ?
N1 Ga Sr 64.712(4) 15 19_665 ?
N1 Ga Sr 64.712(4) . 19_665 ?
Sr Ga Sr 62.62(3) 8_665 19_665 ?
Sr Ga Sr 95.444(19) 1_455 19_665 ?
Sr Ga Sr 95.444(19) 15_545 19_665 ?
N1 Ga Sr 64.712(4) 19 14_456 ?
N1 Ga Sr 64.712(4) 15 14_456 ?
N1 Ga Sr 148.688(14) . 14_456 ?
Sr Ga Sr 95.444(19) 8_665 14_456 ?
Sr Ga Sr 62.62(3) 1_455 14_456 ?
Sr Ga Sr 129.423(8) 15_545 14_456 ?
Sr Ga Sr 129.423(8) 19_665 14_456 ?
N1 Ga Sr 64.712(4) 19 4_545 ?
N1 Ga Sr 148.688(14) 15 4_545 ?
N1 Ga Sr 64.712(4) . 4_545 ?
Sr Ga Sr 95.444(19) 8_665 4_545 ?
Sr Ga Sr 129.423(8) 1_455 4_545 ?
Sr Ga Sr 62.62(3) 15_545 4_545 ?
Sr Ga Sr 129.423(8) 19_665 4_545 ?
Sr Ga Sr 95.444(19) 14_456 4_545 ?
Sr N2 Sr 161.66(3) 3_565 1_565 ?
Sr N2 Sr 83.89(2) 3_565 15 ?
Sr N2 Sr 85.42(2) 1_565 15 ?
Sr N2 Sr 85.42(2) 3_565 13_665 ?
Sr N2 Sr 83.89(2) 1_565 13_665 ?
Sr N2 Sr 108.47(3) 15 13_665 ?
Sr N2 Sr 108.47(3) 3_565 19_665 ?
Sr N2 Sr 85.42(2) 1_565 19_665 ?
Sr N2 Sr 85.42(2) 15 19_665 ?
Sr N2 Sr 161.66(3) 13_665 19_665 ?
Sr N2 Sr 85.42(2) 3_565 7 ?
Sr N2 Sr 108.47(3) 1_565 7 ?
Sr N2 Sr 161.66(3) 15 7 ?
Sr N2 Sr 85.42(2) 13_665 7 ?
Sr N2 Sr 83.89(2) 19_665 7 ?
Ga N1 Sr 141.63(14) . 14_556 ?
Ga N1 Sr 141.63(14) . . ?
Sr N1 Sr 76.7(3) 14_556 . ?
Ga N1 Sr 79.2(2) . 15_545 ?
Sr N1 Sr 119.9(2) 14_556 15_545 ?
Sr N1 Sr 78.28(9) . 15_545 ?
Ga N1 Sr 79.2(2) . 8_665 ?
Sr N1 Sr 78.28(9) 14_556 8_665 ?
Sr N1 Sr 119.9(2) . 8_665 ?
Sr N1 Sr 158.3(4) 15_545 8_665 ?
Ga N1 Sr 79.2(2) . 4_545 ?
Sr N1 Sr 78.28(9) 14_556 4_545 ?
Sr N1 Sr 119.9(2) . 4_545 ?
Sr N1 Sr 68.74(6) 15_545 4_545 ?
Sr N1 Sr 106.98(11) 8_665 4_545 ?
Ga N1 Sr 79.2(2) . 19_665 ?
Sr N1 Sr 119.9(2) 14_556 19_665 ?
Sr N1 Sr 78.28(9) . 19_665 ?
Sr N1 Sr 106.98(11) 15_545 19_665 ?
Sr N1 Sr 68.74(6) 8_665 19_665 ?
Sr N1 Sr 158.3(4) 4_545 19_665 ?
 
_diffrn_measured_fraction_theta_max    0.980
_diffrn_reflns_theta_full              29.99
_diffrn_measured_fraction_theta_full   0.980
_refine_diff_density_max    2.090
_refine_diff_density_min   -2.594
_refine_diff_density_rms    0.288
